# Supplementary material for: Peptides Encoded by Short ORFs Control Development and Define a New Eukaryotic Gene Family
Source: PLOS journal article supplement (doi:10.1371/journal.pbio.0050106), 2007-04-11
Supplement: S1 (10.1371/journal.pbio.0050106.s001) [file journal.pbio.0050106.s001]

# single (A) type-A ORFs

*Drosophila melanogaster* MAAYLDPTGQY MAAYLDPTGQY MSHDLDPTGTY

*Anopheles gambiae* MEILDPTGYY MAKKLDPTGHY MARKLDPTGHY MAPEILDPTGYY

*Lutzomyia longipalpis* (1) MTGILDPTEVY MATELDPTGHY

(2) MASTLDPTGHY MERSLDPTGMY

*Bombyx mori* (1) MDIVTLDPTGLY MELTLDPTGQY MLKVLDPTGQY MTGLDPTEVY

(2) MDVKVLDPTGIY MLGLDPTGVY MYVLDPTGVY MLVLDPTGVY

MGLDPTGVY MFILDPTNVY MFRGLDPTGVY

*Bicyclus aniana* MFVLDPTGVY MFVLDPTGVY MDLDPTNVY MAISLDPTGVY

*Apis mellifera* MARQLDPTGQY MATGLDPTGLY MAGLDPTGQY MAASTGLDPTGQY

*Tribolium castaneum* MSGLDPTGLY MDGGKLDPTGQY MKLNGGKSLDPTGLY

*Homalodisca coagulata* MFPPTLDPTGLY MTSDSILDPTGLY

*Acyrtosiphon pisum* MGLDPTGLY MCGGGPKLDPTGLY

*Aphis gossypii* MGLDPTGLY MCGGGPKLDPTGLY

*Locusta migratoria* MGPKTLDPTGLY MDTPKQLDPTGLY

*Daphnia pulex* MSPKLDPTGLY MANTMVQQSSNVPLDPTGLY

AA ORF (in dipterans only)

*Drosophila melanogaster* MLDPTGTYRRPRDTQDSRQKRRQDC LDPTGQY

*Anopheles gambiae* MNRKLDPTGMYRRPGSGASSSQRSPFHHHHQQLQNHQRMPHHHQQQQQHQVKCHYLDPTGLY

*Lutzomyia longipalpis* MTSTDDKLDPTGMYVRPKIEIECH LDPTEYY

## ORF-B

*Drosphila melanogaster* MIGGARWLRVRGREETSSCRRRRKLGIGASPSDLGEPCDGDFCIYVVFA

*Anopheles gambiae* MALRWWTAPQARWVRSREETSSSRRKRKFPAPGTRQQRWHRLAATVAERMNPRSGRPRMNLGVIVAYY

*Lutzomyia longipalpis* MDPCDRGAVKDLAIDTTIKAWRSVPGREETSSCRRRRKSPKMCAPTLSPATNILSSSLNK

*Bombyx mori* MCCGRRRICTGSSPAETSSCRKRRFHTDFPLC

*Apis mellifera* MGRRVRGREETSTSNLRRTEWSIHIRKGRHRPPFTLDLKTHQ

*Tribolium castaneum* MWHRNRGDGGRPETSSGRRRRLR
